# Supplementary material
Source: PubMed Central journal article supplement (PMC2976174)
Supplement: supp_76_22_7566__1.pdf [file supp_76_22_7566__1.pdf]

## SUPPLEMENTAL MATERIALS AND METHODS

### **Preparation of Xylulose-5-phosphate**

Xylulose-5-phosphate (Xyl5P) was prepared by the ATP-dependent conversion of D-xylulose to Xyl5P catalyzed by xylulose kinase from *E. coli* (EcXK). EcXK was expressed in *E. coli* BL21a and isolated as reported recently (6). The purified enzyme fractions displayed a specific activity of 20 U/mg determined at pH 7.5 under conditions described elsewhere (6). D-Xylulose was prepared at a purity of 90% by applying a protocol described previously (15). Preparation of Xyl5P was carried out in 1.5 mL Eppendorf tubes (working volume was 1 mL). Equimolar amounts of ATP and xylulose (107 mM of each) were applied in 100 mM HEPES/KOH buffer pH 7.5 containing 150 mM NaCl. Xyl5P production was initiated by the addition of EcXK (final concentration 50 U/mL) and reaction mixtures were incubated at ambient temperature for 15 h. EcXK was separated by ultrafiltration (Vivaspin 4 concentrator, cut off of 10 kDa, Sartorius Stedim Biotech, S. A., Aubagne, France). Concentrations of ADP and ATP were determined from the reaction solution by LC-MS/MS which contained  $48 \pm 5$  mM ATP and  $56 \pm 6$  mM ADP (= [Xyl5P]).

SUPPLEMENTAL TABLES

**Table S1. Collection of strains used in this study**

| Strain        | Genotype                                                                                                                                         | Ref. |
|---------------|--------------------------------------------------------------------------------------------------------------------------------------------------|------|
| BP000         | CEN.PK 113-5D <i>ura3::</i> (GPDp-XKSI-CYCI <sub>t</sub> , GPDp- <i>CtXR</i> -Wt-<br>CYCI <sub>t</sub> , GPDp- <i>GmXDH</i> -CYCI <sub>t</sub> ) | (19) |
| BP10001       | CEN.PK 113-5D <i>ura3::</i> (GPDp-XKSI-CYCI <sub>t</sub> , GPDp- <i>CtXR</i> -Dm-<br>CYCI <sub>t</sub> , GPDp- <i>GmXDH</i> -CYCI <sub>t</sub> ) | (19) |
| CEN.PK 113-7D | <i>MATa URA3 HIS3 LEU2 TRP1 MAL2-8<sup>c</sup> SUC2</i>                                                                                          | (26) |

**Table S2. Collection of chemicals used for metabolite identification by LC-MS/MS along with their corresponding masses of mother and daughter ions.<sup>a</sup>**

| Compound                   | mother ion / daughter ion        |
|----------------------------|----------------------------------|
| Glucose-6-phosphate        | 259 / 97 (265 / 97) <sup>b</sup> |
| Fructose-6-phosphate       | 259 / 97 (265 / 97)              |
| 6-Phosphogluconate         | 275 / 79 (281 / 79)              |
| Ribulose-5-phosphate       | 229 / 97 (234 / 97)              |
| Ribose-5-phosphate         | 229 / 97 (234 / 97)              |
| Xylulose-5-phosphate       | 229 / 97 (234 / 97)              |
| Fructose-1,6-bisphosphate  | 339 / 97 (345 / 97)              |
| Glyceraldehyde-3-phosphate | 169 / 97 (172 / 97)              |
| 3-Phosphoglycerate         | 185 / 79 (188 / 79)              |
| Dihydroxyacetone phosphate | 169 / 97 (172 / 97)              |
| Glycerol-3-phosphate       | 171 / 79 (174 / 79)              |
| Phosphoenolpyruvate        | 167 / 79 (170 / 79)              |
| NADH                       | 664.3 / 79 (685 / 79)            |
| NAD <sup>+</sup>           | 662.3 / 540 (683 / 555)          |
| NADPH                      | 744 / 79 (765 / 79)              |
| NADP <sup>+</sup>          | 742 / 620 (763 / 635)            |
| ATP                        | 506 / 159 (515.9 / 159)          |
| ADP                        | 426 / 79(436 / 79)               |
| AMP                        | 346 / 79 (356 / 79)              |
| GTP                        | 522 / 79 (531.9 / 79)            |
| GDP                        | 442 / 79 (452 / 79)              |
| GMP                        | 362 / 79(372 / 79)               |
| Glutamate                  | 146 / 102 (151 / 106)            |
| Glutamine                  | 145 / 127 (150 / 132)            |
| Aspartate                  | 132 / 115 (136 / 119)            |
| Arginine                   | 173 / 131 (179 / 136)            |
| Tyrosine                   | 180 / 163 (189 / 172)            |
| Tryptophane                | 203 / 116 (214 / 124)            |
| Serine                     | 104 / 74 (107 / 76)              |
| Methionine                 | 148 / 47 (153 / 48)              |

<sup>a</sup>A mixture containing all compounds listed but Xyl5P was applied (see text). Xyl5P was prepared enzymatically as described in Supplemental Materials and Methods.<sup>b</sup> Values in parentheses indicate masses of mother and daughter ions from <sup>13</sup>C-labeled counterparts.

**Table S3. Summary of metabolite pools obtained for CEN.PK 113-7D, BP000 and BP10001.**<sup>a</sup>

| Metabolite                       | BP10001<br>on xylose | BP000<br>on xylose | CEN.PK 113-7D<br>on xylose | CEN.PK 113-7D<br>on glucose |
|----------------------------------|----------------------|--------------------|----------------------------|-----------------------------|
| <u>Central carbon metabolism</u> |                      |                    |                            |                             |
| Xyl5P                            | 0.5 ± 0.1            | 0.3 ± 0.1          | 0.03 ± 0.05                | 0.7 ± 0.1                   |
| Ru5P                             | 0.39 ± 0.03          | 0.3 ± 0.1          | n.d. <sup>b</sup>          | 0.3 ± 0.1                   |
| Rib5P                            | 0.21 ± 0.03          | 0.18 ± 0.03        | 0.051 ± 0.005              | 0.39 ± 0.05                 |
| S7P <sup>c</sup>                 | 31 ± 5               | 23 ± 6             | 0.08 ± 0.03                | 26 ± 5                      |
| 6PG                              | 0.014 ± 0.004        | 0.013 ± 0.001      | 0.007 ± 0.003              | 1.5 ± 0.2                   |
| Glc6P                            | 0.31 ± 0.02          | 0.24 ± 0.02        | 0.039 ± 0.005              | 13 ± 1                      |
| Fru6P                            | 0.07 ± 0.01          | 0.07 ± 0.02        | 0.031 ± 0.004              | 1.1 ± 0.1                   |
| Fru(1,6)P <sub>2</sub>           | 0.30 ± 0.03          | 0.29 ± 0.03        | n.d. <sup>b</sup>          | 35 ± 6                      |
| Ga3P                             | 0.17 ± 0.01          | 0.15 ± 0.02        | n.d. <sup>b</sup>          | 0.54 ± 0.02                 |
| DHAP                             | 0.4 ± 0.1            | 0.4 ± 0.1          | n.d. <sup>b</sup>          | 5.5 ± 0.5                   |
| G3P                              | 0.26 ± 0.05          | 0.23 ± 0.03        | 0.08 ± 0.01                | 1.4 ± 0.1                   |
| 2PG + 3PG                        | 0.50 ± 0.05          | 0.50 ± 0.03        | 0.3 ± 0.1                  | 6.1 ± 0.3                   |
| 2PG <sup>d</sup>                 | 0.04                 | 0.04               | 0.026                      | 0.52                        |
| 3PG <sup>d</sup>                 | 0.46                 | 0.46               | 0.274                      | 5.58                        |
| PEP                              | 0.28 ± 0.01          | 0.28 ± 0.02        | 0.09 ± 0.01                | 0.7 ± 0.1                   |
| <u>Redox metabolism</u>          |                      |                    |                            |                             |
| NADH                             | 0.7 ± 0.1            | 0.7 ± 0.2          | 0.4 ± 0.1                  | 0.7 ± 0.2                   |
| NAD <sup>+</sup>                 | 1.8 ± 0.2            | 1.2 ± 0.1          | 0.8 ± 0.1                  | 2.4 ± 0.6                   |
| NADPH                            | 0.07 ± 0.02          | 0.05 ± 0.02        | 0.014 ± 0.005              | 0.09 ± 0.01                 |
| NADP <sup>+</sup>                | 0.08 ± 0.01          | 0.069 ± 0.001      | 0.014 ± 0.002              | 0.25 ± 0.10                 |
| <u>Energy metabolism</u>         |                      |                    |                            |                             |
| ATP                              | 9.5 ± 1.0            | 7.3 ± 0.3          | 0.20 ± 0.01                | 13 ± 1                      |
| ADP                              | 4.3 ± 0.4            | 4.0 ± 0.3          | 0.56 ± 0.1                 | 4.7 ± 0.7                   |
| AMP                              | 2.2 ± 0.1            | 2.3 ± 0.1          | 3.9 ± 0.3                  | 1.1 ± 0.2                   |
| AXP pool                         | 16 ± 1.5             | 14 ± 1             | 4.8 ± 0.4                  | 19 ± 2                      |
| Energy charge                    | 0.73                 | 0.68               | 0.11                       | 0.82                        |
| GTP                              | 1.7 ± 0.1            | 1.7 ± 0.1          | n.d. <sup>b</sup>          | 3.0 ± 0.2                   |
| GDP                              | 0.8 ± 0.1            | 0.9 ± 0.1          | 0.20 ± 0.04                | 0.9 ± 0.1                   |
| GMP                              | 0.58 ± 0.04          | 0.8 ± 0.1          | 1.5 ± 0.1                  | 0.12 ± 0.03                 |
| GXP pool                         | 3.0 ± 0.2            | 3.4 ± 0.3          | 1.7 ± 0.1                  | 4.0 ± 0.3                   |
| <u>Amino acids</u>               |                      |                    |                            |                             |
| Glu                              | 96 ± 4               | 78 ± 8             | 127 ± 8                    | 75 ± 2                      |
| Gln                              | 41 ± 3               | 26 ± 2             | 8 ± 1                      | 35 ± 3                      |
| Asp                              | 4.9 ± 0.3            | 3.0 ± 0.2          | 4.6 ± 0.3                  | 10.3 ± 0.4                  |
| Arg                              | 71 ± 5               | 43 ± 7             | 53 ± 3                     | 104 ± 4                     |
| Tyr                              | 8.4 ± 0.5            | 5.9 ± 0.3          | 1.2 ± 0.2                  | 1.2 ± 0.2                   |
| Trp                              | 1.20 ± 0.04          | 1.2 ± 0.1          | 0.5 ± 0.1                  | 0.20 ± 0.05                 |
| Ser                              | 2.3 ± 0.2            | 1.5 ± 0.1          | 1.3 ± 0.1                  | 4.4 ± 0.4                   |
| Met                              | 0.11 ± 0.02          | 0.21 ± 0.02        | 0.56 ± 0.01                | 0.16 ± 0.02                 |

<sup>a</sup> Values are shown in  $\mu\text{mol/gCDW}$  and represent averages of six biological samples obtained from two individual fermentations. <sup>b</sup> n.d., not detectable; <sup>c</sup> Values relate to a MS signal corrected by corresponding internal standard signal per gCDW. <sup>d</sup> Concentrations were calculated assuming the interconversion of 2PG and 3PG catalyzed by GPM to be at equilibrium (9).

**Table S4. Summary of thermodynamic analysis.**

| Enzyme           | $K_{eq}$               | Ref. | CEN.PK 113-7D      | CEN.PK 113-7D      | BP10001            | BP000              |
|------------------|------------------------|------|--------------------|--------------------|--------------------|--------------------|
|                  |                        |      | on glucose         | on xylose          | on xylose          | on xylose          |
|                  |                        |      | $\Delta\Delta G^a$ | $\Delta\Delta G^a$ | $\Delta\Delta G^a$ | $\Delta\Delta G^a$ |
| PGI              | 0.31                   | (25) | -3.3 ± 0.4         | 2.4 ± 0.7          | -0.8 ± 0.5         | -0.3 ± 1           |
| PFK              | 800                    | (10) | -11 ± 1            | n.d. <sup>b</sup>  | -15 ± 1            | -15 ± 1            |
| FBA              | 0.099 mM <sup>c</sup>  | (27) | -2.6 ± 1           | n.d. <sup>b</sup>  | -0.2 ± 1           | -0.4 ± 1           |
| GA3PDH-PGK       | 1.83 mM <sup>-1c</sup> | (5)  | -0.1 ± 2           | n.d. <sup>b</sup>  | -0.2 ± 1.7         | -0.2 ± 1.6         |
| GPM              | 0.19                   | (9)  | -0.02 ± 0.3        | -0.02 ± 1.8        | -0.02 ± 0.5        | -0.02 ± 0.3        |
| ENO              | 4.5                    | (31) | -4.6 ± 0.5         | -2.4 ± 1.1         | -0.6 ± 0.3         | -0.6 ± 0.3         |
| PYK <sup>d</sup> | 6500                   | (2)  | -16 ± 3            | -17 ± 4            | -15 ± 2            | -15 ± 2            |
| TPI              | 22                     | (27) | -1.9 ± 0.3         | n.d. <sup>b</sup>  | -5.6 ± 0.7         | -5 ± 1             |
| G3PDH            | 4300                   | (2)  | -21 ± 2            | n.d. <sup>b</sup>  | -20 ± 2            | -21 ± 2            |
| G6PDH-lactonase  | 1×10 <sup>5</sup>      | (3)  | -37 ± 1            | -33 ± 3            | -37 ± 2            | -37 ± 1            |
| GND              | 77 mM <sup>c</sup>     | (28) | -9 ± 2             | n.d. <sup>b</sup>  | -1 ± 2             | -2 ± 2             |
| RKI              | 1.2                    | (3)  | 0.3 ± 1.2          | n.d. <sup>b</sup>  | -2.0 ± 0.6         | -1.6 ± 1.3         |
| RPE              | 1.8                    | (3)  | 0.8 ± 1.2          | n.d. <sup>b</sup>  | -0.9 ± 0.7         | -1.5 ± 2           |
| TKL-TAL          | 22.9                   | (3)  | -4.7 ± 1.6         | n.d. <sup>b</sup>  | -18 ± 2            | -16 ± 4            |
| ADK1             | 0.8                    | (1)  | -0.5 ± 1.4         | 2.6 ± 2.5          | 0.9 ± 0.9          | 0.7 ± 0.6          |

<sup>a</sup> $\Delta\Delta G$  values refer to the difference of  $\Delta G_{K_{eq}} - \Delta G_{MAR}$ , where  $\Delta G$ ,  $K_{eq}$  and MAR denote Gibbs free energy, equilibrium constant and mass action ratio, respectively. Values are shown in kJ/mol. Reactant concentrations were taken from Supplemental Table S3. <sup>b</sup>n.d., not determined; <sup>c</sup>A value of 2.38 mL per gCDW was used to calculate molar concentrations (7). <sup>d</sup>Pyruvate concentrations of 0.6 mM and 2 mM were used as lower and upper bounds for calculation of  $\Delta G_{MAR}$  (24, 29).

**Table S5. Summary of results obtained from metabolic control analysis performed for enzymes constituting the xylose pathway and from analysis of coenzyme usage of XR in BP000 and BP10001<sup>a</sup>**

|                                                           | BP10001                                 | BP000                                        | Ref. |
|-----------------------------------------------------------|-----------------------------------------|----------------------------------------------|------|
| <b>XR<sup>b</sup></b>                                     |                                         |                                              |      |
| $K_{\text{NADH}}$ [ $\mu\text{M}$ ]                       | 41                                      | 38                                           | (18) |
| $K_{i,\text{NADH}}$ [ $\mu\text{M}$ ]                     | 30                                      | 19                                           | (18) |
| $K_{\text{NADPH}}$ [ $\mu\text{M}$ ]                      | 128                                     | 3                                            | (18) |
| $K_{i,\text{NADPH}}$ [ $\mu\text{M}$ ]                    | 64                                      | 1                                            | (18) |
| $K_{\text{xylose}}^{\text{NADH}}$ [ $\text{mM}$ ]         | 106                                     | 142                                          | (18) |
| $K_{\text{xylose}}^{\text{NADPH}}$ [ $\text{mM}$ ]        | 722                                     | 96                                           | (18) |
| $V_{\text{max}}^{\text{NADH}}$ [ $\text{s}^{-1}$ ]        | 12                                      | 11                                           | (18) |
| $V_{\text{max}}^{\text{NADPH}}$ [ $\text{s}^{-1}$ ]       | 30                                      | 13                                           | (18) |
| $v_{\text{NADH}}$ [ $\text{s}^{-1}$ ]                     | $5.7 \pm 0.1$                           | $2.7 \pm 0.1$                                |      |
| $v_{\text{NADPH}}$ [ $\text{s}^{-1}$ ]                    | $0.19 \pm 0.03$                         | $3.4 \pm 0.1$                                |      |
| $v_{\text{NADH}} + v_{\text{NADPH}}$ [ $\text{s}^{-1}$ ]  | 5.9                                     | 6.1                                          |      |
| $v_{\text{NADH}}/v_{\text{NADPH}}$                        | $30 \pm 5$<br>$(1.2)^c$<br>$\geq 1.3^d$ | $0.8 \pm 0.2$<br>$(0.03)^c$<br>$\geq 0.96^d$ |      |
| $\epsilon_{\text{NADH}}^e$                                | 0.11                                    | -0.06                                        |      |
| $\epsilon_{\text{NADPH}}^e$                               | -0.01                                   | 0.11                                         |      |
| $\epsilon_{\text{xylose}}^e$                              | 0.45                                    | 0.44                                         |      |
| <b>XDH</b>                                                |                                         |                                              |      |
| $K_{\text{NAD}^+}$ [ $\mu\text{M}$ ]                      | 140                                     | 140                                          | (16) |
| $K_{i,\text{NAD}^+}$ [ $\mu\text{M}$ ]                    | 780                                     | 780                                          | (16) |
| $K_{\text{xylylitol}}$ [ $\text{mM}$ ]                    | 12                                      | 12                                           | (16) |
| $v$ [%] <sup>f</sup>                                      |                                         |                                              |      |
| xylylitol 50 mM                                           | $60 \pm 2$                              | $53 \pm 2$                                   |      |
| xylylitol 150 mM                                          | $74 \pm 1$                              | $67 \pm 2$                                   |      |
| $\epsilon_{\text{xylylitol}} / \epsilon_{\text{NAD}^+}^e$ |                                         |                                              |      |
| xylylitol 50 mM                                           | 0.29 / 0.26                             | 0.32 / 0.34                                  |      |
| xylylitol 150 mM                                          | 0.12 / 0.20                             | 0.14 / 0.27                                  |      |
| <b>XK<sup>g</sup></b>                                     |                                         |                                              |      |
| $K_{\text{ATP}}$ [ $\text{mM}$ ]                          | 1.55                                    | 1.55                                         | (21) |
| $v$ [%] <sup>f</sup>                                      | $72 \pm 2$                              | $66 \pm 1$                                   |      |

---

**Table S5 (continued). Summary of results obtained from metabolic control analysis performed for enzymes constituting the xylose pathway and from analysis of coenzyme usage of XR in BP000 and BP10001<sup>a</sup>**

---

<sup>a</sup>Reactant concentrations ( $\mu\text{mol/gCDW}$ ) from Supplemental Table S3 were transformed into  $\text{mmol/L}$  by assuming a cell volume of  $2.38 \text{ mL/gCDW}$  (7). <sup>b</sup>A rate equation accounting for the simultaneous utilization of NADH and NADPH was applied to XR catalyzed reduction of xylose (20). An intracellular concentration for xylose of  $133 \text{ mM}$  (=  $\text{mM}$  xylose in the medium (8)) was assumed. <sup>c</sup>Values in parentheses were obtained by using  $508 \mu\text{M}$  NADPH (17). <sup>d</sup>Values depict lower bounds of  $v_{\text{NADH}}/v_{\text{NADPH}}$  obtained from FB analysis using a genome-scale network model (14). Note that the genome-scale network was always compatible with a 100% usage of NADH by XR while a 100% usage of NADPH was not. <sup>e</sup>Elasticity coefficients  $\epsilon$  were obtained from the relationship  $[S]\delta v / (v\delta[S])$ , in which  $[S]$  and  $v$  corresponded to the concentration of a reactant and the respective steady-state rate constant, respectively (23). Differences in  $v$  ( $\delta v$ ) were calculated by presuming an increase of reactant concentration by 1% ( $\delta[S] = 0.01[S]$ ). <sup>f</sup>Values of steady-state rates represent the degree of rate saturation relative to the maximal turnover number (=100%). <sup>g</sup>Estimates for  $v$  were obtained from the Michaelis Menten rate equation.

---

**Table S6. Summary of metabolic control analysis of reactions catalyzed by PFK, PYK, TKL and TAL<sup>a</sup>**

|                                                            | glucose-growing   |                  | xylose-metabolizing |  | Ref. |
|------------------------------------------------------------|-------------------|------------------|---------------------|--|------|
|                                                            | CEN.PK 113-7D     | BP10001          | BP000               |  |      |
| <b>PFK<sup>b</sup></b>                                     |                   |                  |                     |  |      |
| $v$ [%]                                                    | $63 \pm 3$        | $2.7 \pm 0.6$    | $3.2 \pm 1.6$       |  | (10) |
| $K_{\text{ATP}}$ [mM]                                      | $0.28 \pm 0.04$   | $0.26 \pm 0.02$  | $0.24 \pm 0.01$     |  |      |
| $K_{\text{Fru6P}}$ [mM]                                    | $0.24 \pm 0.01$   | $0.17 \pm 0.01$  | $0.16 \pm 0.01$     |  |      |
| $L$                                                        | $0.003 \pm 0.002$ | $4.2 \pm 0.6$    | $4.0 \pm 1.4$       |  |      |
| $\epsilon_{\text{Fru6P}}^c$                                | $0.36 \pm 0.04$   | $1.8 \pm 0.1$    | $1.8 \pm 0.1$       |  |      |
| $\epsilon_{\text{ATP}}^c$                                  | $-0.11 \pm 0.04$  | $-0.41 \pm 0.01$ | $-0.31 \pm 0.02$    |  |      |
| $\epsilon_{\text{ADP}}^c$                                  | $-0.01 \pm 0.01$  | $-0.04 \pm 0.01$ | $-0.064 \pm 0.002$  |  |      |
| $\epsilon_{\text{AMP}}^c$                                  | $0.13 \pm 0.04$   | $0.46 \pm 0.01$  | $0.39 \pm 0.03$     |  |      |
| <b>PYK<sup>d</sup></b>                                     |                   |                  |                     |  |      |
| $K_{\text{PEP}} = 0.09$ mM; $K_{\text{ADP}} = 0.18$ mM     |                   |                  |                     |  | (32) |
| $v$ [%]                                                    | $70 \pm 3$        | $52 \pm 1$       | $51 \pm 2$          |  | (13) |
| $\epsilon_{\text{PEP}}^c$                                  | $0.24 \pm 0.06$   | $0.43 \pm 0.02$  | $0.43 \pm 0.02$     |  |      |
| $\epsilon_{\text{ADP}}^c$                                  | $0.09 \pm 0.02$   | $0.09 \pm 0.02$  | $0.10 \pm 0.01$     |  |      |
| <b>TKL</b>                                                 |                   |                  |                     |  |      |
| $K_{\text{Xyl5P}} = 0.07$ mM; $K_{\text{Rib5P}} = 0.15$ mM |                   |                  |                     |  | (30) |
| $v$ [%]                                                    | $42 \pm 4$        | $28 \pm 4$       | $21 \pm 5$          |  | (4)  |
| $\epsilon_{\text{Xyl5P}}^c$                                | $0.19 \pm 0.02$   | $0.25 \pm 0.04$  | $0.4 \pm 0.1$       |  |      |
| $\epsilon_{\text{Rib5P}}^c$                                | $0.48 \pm 0.03$   | $0.63 \pm 0.03$  | $0.66 \pm 0.04$     |  |      |
| $K_{\text{Ga3P}} = 4.9$ mM; $K_{\text{Fru6P}} = 1.8$ mM    |                   |                  |                     |  | (22) |
| $v$ [%]                                                    | $0.9 \pm 0.1$     | $0.02 \pm 0.01$  | $0.02 \pm 0.01$     |  | (4)  |
| $\epsilon_{\text{Ga3P}}^c$                                 | $0.96 \pm 0.01$   | $0.99 \pm 0.01$  | $0.99 \pm 0.01$     |  |      |
| $\epsilon_{\text{Fru6P}}^c$                                | $0.79 \pm 0.01$   | $0.98 \pm 0.01$  | $0.98 \pm 0.01$     |  |      |
| <b>TAL<sup>e, f</sup></b>                                  |                   |                  |                     |  |      |
| $K_{\text{Fru6P}} = 0.32$ mM                               |                   |                  |                     |  | (11) |
| $v$ [%]                                                    | $59 \pm 2$        | $8 \pm 1$        | $8 \pm 2$           |  |      |
| $K_{\text{Ga3P}} = 0.22$ mM                                |                   |                  |                     |  | (12) |
| $v$ [%]                                                    | $71 \pm 1$        | $44 \pm 1$       | $41 \pm 1$          |  |      |



---

**Table S6 (continued). Summary of metabolic control analysis for reactions catalyzed by PFK, PYK, TKL and TAL<sup>a</sup>**

---

<sup>a</sup>Reactant concentrations ( $\mu\text{mol/gCDW}$ ) from Supplemental Table S3 were transformed into  $\text{mmol/L}$  by assuming a cell volume of  $2.38 \text{ mL/gCDW}$  (7). Values of steady-state rates represent the degree of rate saturation relative to the maximal turnover number (=100%).

<sup>b</sup>Kinetic parameters were calculated from the allosteric kinetic model reported for PFK (10).

<sup>c</sup>Elasticity coefficients  $\varepsilon$  were obtained from the relationship  $[S]\delta v / (v\delta[S])$ .  $[S]$  and  $v$  corresponded to the concentration of a reactant and the respective steady-state rate constant, respectively (23). Differences in  $v$  ( $\delta v$ ) were calculated by presuming an increase of reactant concentration by 1% ( $\delta[S] = 0.01[S]$ ).

<sup>d</sup>Values representing high affinity Michaelis constants for PEP and ADP were applied as Fru(1,6)P<sub>2</sub> pools were present at saturating concentrations ( $K_a = 0.014 \text{ mM}$  (32)) in both glucose-growing and xylose-metabolizing cells.

<sup>e</sup>Estimates for  $v$  were obtained from the Michaelis Menten rate equation. <sup>f</sup>Data predicted that the preferred net reaction of TAL-TKL in xylose-metabolizing cells was  $2\text{Xyl5P} + \text{Rib5P} \rightarrow 2\text{Fru6P} + \text{Ga3P}$

---

## SUPPLEMENTAL FIGURE LEGENDS

Figure S1. Pathways for utilization of L-arabinose and D-xylose. Solid lines indicate oxidoreductive pathways typical of yeast and fungi while dashed lines indicate pathways typical of bacteria. The following abbreviations were used: *XylA* – xylose isomerase, *XYL1* - aldose reductase, *XYL2* – xylitol dehydrogenase, *XYL3* – xylulose kinase, *lad1* – L-arabitol 4-dehydrogenase, *lxr1* – L-xylulose reductase, *araA* – arabinose isomerase, *araB* – L-ribulokinase, *araD* – L-ribulose-5-phosphate 4-epimerase

Figure S2. Elution profiles of pentose 5-P isomers (A) and respective <sup>13</sup>C-compounds (B). Black and grey solid lines indicate elution profiles obtained for metabolite extracts of CEN.PK 113-7D grown on glucose and BP10001 metabolizing xylose, respectively. Elution profiles of metabolite extracts of CEN.PK 113-7D and BP000 cultivated on xylose are shown as grey and black dashed lines, respectively. Dotted lines indicate the retention times.

Figure S3. Heat maps representing changes of intracellular metabolite levels of xylose-metabolizing cells (BP000 and BP10001) and xylose-resting (CEN.PK 113-7D) cells relative to glucose-growing cells. Fold-change of metabolite pools is displayed in shades of red (decrease) and blue (increase). PPP, PP pathway; UG, upper glycolysis; LG, lower glycolysis; GM, glycerol metabolism; EM, energy metabolites; RM, redox metabolites; AA, amino acids; xPG, sum of 2PG and 3PG

SUPPLEMENTAL FIGURES

Figure S1

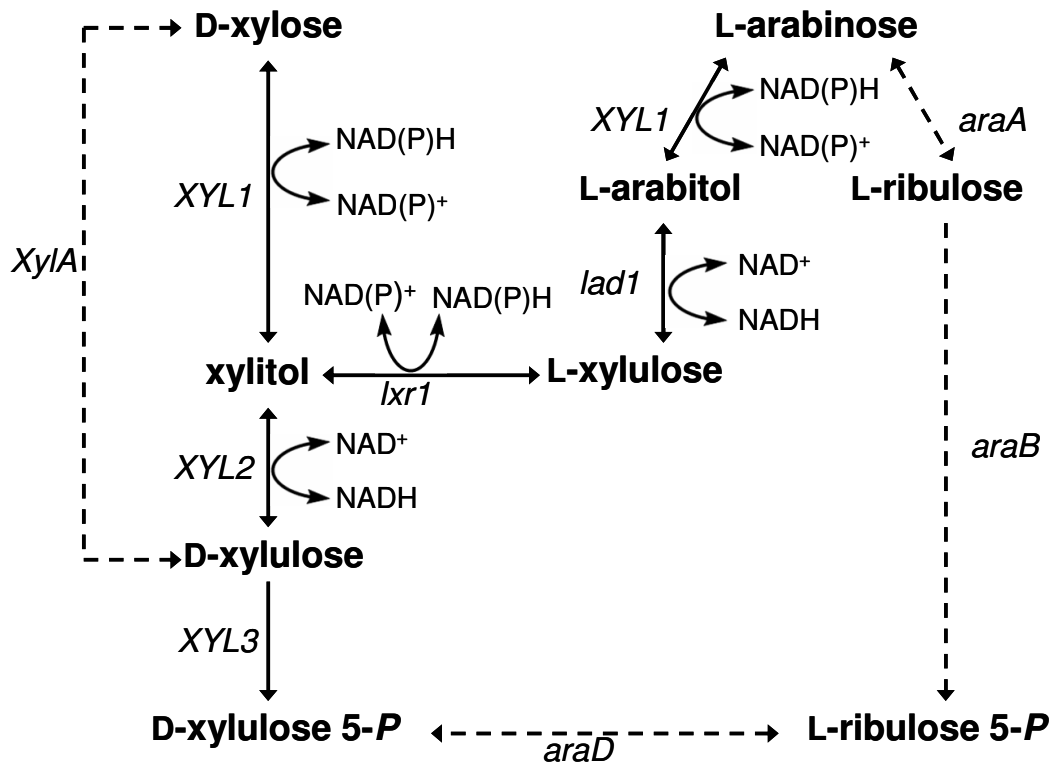

**Figure S2**

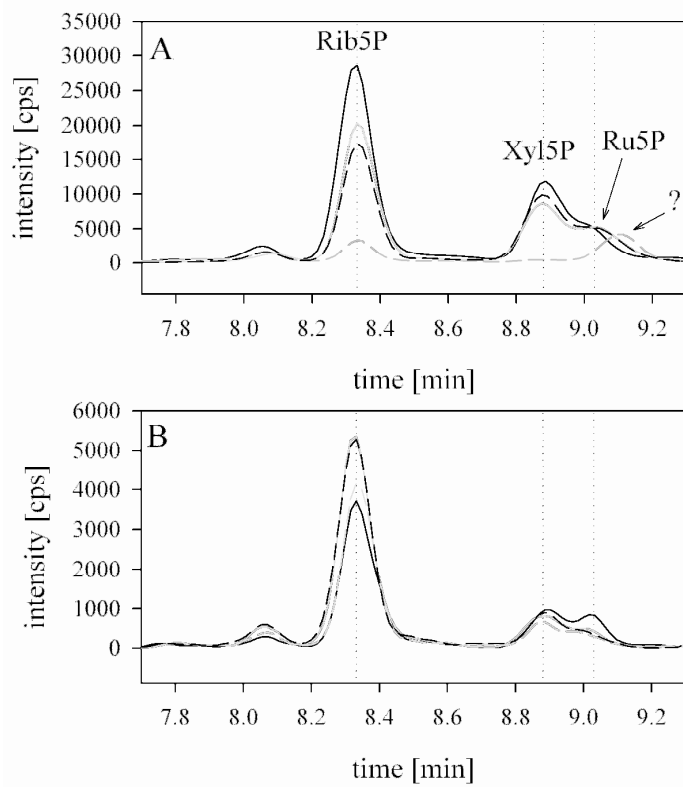

**Figure S3**

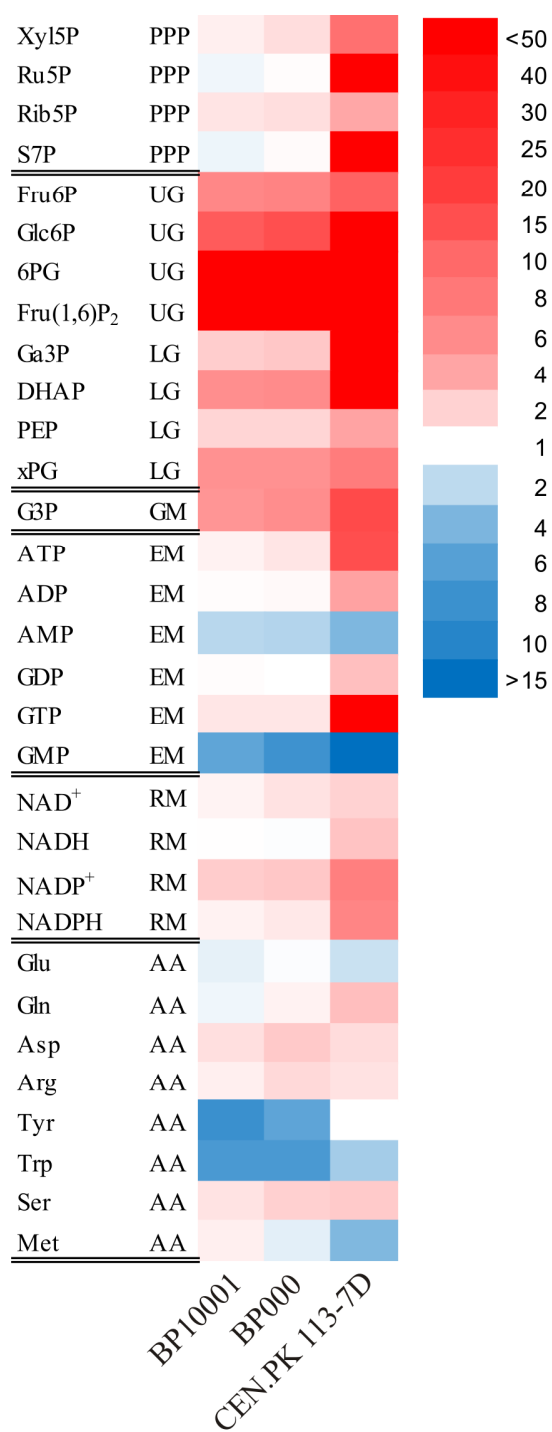

## SUPPLEMENTAL REFERENCES

1. **Ballard, F. J.** 1970. Adenine nucleotides and the adenylate kinase equilibrium in livers of foetal and newborn rats. *Biochem. J.* **117**:231-235.
2. **Bergmeyer, H. U.** 1974. *Methods of enzymatic analysis.* Verlag Chemie, Weinheim, Germany.
3. **Casazza, J. P., and R. L. Veech.** 1986. The interdependence of glycolytic and pentose cycle intermediates in ad libitum fed rats. *J. Biol. Chem.* **261**:690-698.
4. **Cleland, W. W.** 1963. The kinetics of enzyme-catalyzed reactions with two or more substrates or products. I. Nomenclature and rate equations. *Biochim. Biophys. Acta* **67**:104-137.
5. **Cornell, N. W., M. Leadbetter, and R. L. Veech.** 1979. Effects of free magnesium concentration and ionic strength on equilibrium constants for the glyceraldehyde phosphate dehydrogenase and phosphoglycerate kinase reactions. *J. Biol. Chem.* **254**:6522-6527.
6. **Di Luccio, E., B. Petschacher, J. Voegtli, H. T. Chou, H. Stahlberg, B. Nidetzky, and D. K. Wilson.** 2007. Structural and kinetic studies of induced fit in xylulose kinase from *Escherichia coli*. *J. Mol. Biol.* **365**:783-798.
7. **Ditzelmüller, G., W. Wöhrer, C. P. Kubicek, and M. Röhr.** 1983. Nucleotide pools of growing, synchronized and stressed cultures of *Saccharomyces cerevisiae*. *Arch. Microbiol.* **135**:63-67.
8. **Gárdonyi, M., M. Jeppsson, G. Lidén, M. F. Gorwa-Grauslund, and B. Hahn-Hägerdal.** 2003. Control of xylose consumption by xylose transport in recombinant *Saccharomyces cerevisiae*. *Biotechnol. Bioeng.* **82**:818-824.
9. **Grisolia, S., and J. Carreras.** 1975. Phosphoglycerate mutase from yeast, chicken breast muscle, and kidney (2, 3-PGA-dependent). *Methods Enzymol.* **42**:435-450.
10. **Hofmann, E., and G. Kopperschläger.** 1982. Phosphofructokinase from yeast. *Methods Enzymol.* **90 Pt E**:49-60.
11. **Horecker, B. L., and P. Z. Smyrniotis.** 1955. Purification and properties of yeast transaldolase. *J. Biol. Chem.* **212**:811-825.
12. **Horecker, B. L., O. Tsolas, and C. Y. Lai.** 1972. Aldolases, p. 259-280. *In* P. D. Boyer (ed.), *The enzymes*, vol. 7. Academic Press, New York NY.
13. **Hynne, F., S. Danø, and P. G. Sørensen.** 2001. Full-scale model of glycolysis in *Saccharomyces cerevisiae*. *Biophys. Chem.* **94**:121-163.
14. **Krahulec, S., B. Petschacher, M. Wallner, K. Longus, M. Klimacek, and B. Nidetzky.** 2010. Fermentation of mixed glucose-xylose substrates by engineered strains of *Saccharomyces cerevisiae*: role of the coenzyme specificity of xylose reductase, and effect of glucose on xylose utilization. *Microb. Cell. Fact.* **9**:16.
15. **Mayer, G., K. D. Kulbe, and B. Nidetzky.** 2002. Utilization of xylitol dehydrogenase in a combined microbial/enzymatic process for production of xylitol from D-glucose. *Appl. Biochem. Biotechnol.* **98-100**:577-589.
16. **Nidetzky, B., H. Helmer, M. Klimacek, R. Lunzer, and G. Mayer.** 2003. Characterization of recombinant xylitol dehydrogenase from *Galactocandida mastotermitis* expressed in *Escherichia coli*. *Chem. Biol. Interact.* **143-144**:533-542.

17. **Nissen, T. L., M. Anderlund, J. Nielsen, J. Villadsen, and M. C. Kielland-Brandt.** 2001. Expression of a cytoplasmic transhydrogenase in *Saccharomyces cerevisiae* results in formation of 2-oxoglutarate due to depletion of the NADPH pool. *Yeast* **18**:19-32.
18. **Petschacher, B., S. Leitgeb, K. L. Kavanagh, D. K. Wilson, and B. Nidetzky.** 2005. The coenzyme specificity of *Candida tenuis* xylose reductase (AKR2B5) explored by site-directed mutagenesis and X-ray crystallography. *Biochem. J.* **385**:75-83.
19. **Petschacher, B., and B. Nidetzky.** 2008. Altering the coenzyme preference of xylose reductase to favor utilization of NADH enhances ethanol yield from xylose in a metabolically engineered strain of *Saccharomyces cerevisiae*. *Microb. Cell Fact.* **7**:9.
20. **Petschacher, B., and B. Nidetzky.** 2005. Engineering *Candida tenuis* Xylose reductase for improved utilization of NADH: antagonistic effects of multiple side chain replacements and performance of site-directed mutants under simulated *in vivo* conditions. *Appl. Environ. Microbiol.* **71**:6390-6393.
21. **Richard, P., M. H. Toivari, and M. Penttilä.** 2000. The role of xylulokinase in *Saccharomyces cerevisiae* xylulose catabolism. *FEMS Microbiol. Lett.* **190**:39-43.
22. **Schenk, G., R. G. Duggleby, and P. F. Nixon.** 1998. Properties and functions of the thiamin diphosphate dependent enzyme transketolase. *Int. J. Biochem. Cell Biol.* **30**:1297-1318.
23. **Stephanopoulos, G. N., A. Aristidou, and J. Nielsen.** 1998. *Metabolic engineering, principles and methodologies.* Academic Press, San Diego.
24. **Teusink, B., J. Passarge, C. A. Reijenga, E. Esgalhado, C. C. van der Weijden, M. Schepper, M. C. Walsh, B. M. Bakker, K. van Dam, H. V. Westerhoff, and J. L. Snoep.** 2000. Can yeast glycolysis be understood in terms of *in vitro* kinetics of the constituent enzymes? Testing biochemistry. *Eur. J. Biochem.* **267**:5313-5329.
25. **Tewari, Y. B., D. K. Steckler, and R. N. Goldberg.** 1988. Thermodynamics of isomerization reactions involving sugar phosphates. *J. Biol. Chem.* **263**:3664-3669.
26. **van Dijken, J. P., J. Bauer, L. Brambilla, P. Duboc, J. M. Francois, C. Gancedo, M. L. Giuseppin, J. J. Heijnen, M. Hoare, H. C. Lange, E. A. Madden, P. Niederberger, J. Nielsen, J. L. Parrou, T. Petit, D. Porro, M. Reuss, N. van Riel, M. Rizzi, H. Y. Steensma, C. T. Verrips, J. Vindelov, and J. T. Pronk.** 2000. An interlaboratory comparison of physiological and genetic properties of four *Saccharomyces cerevisiae* strains. *Enzyme Microb. Technol.* **26**:706-714.
27. **Veech, R. L., L. Rajman, K. Dalziel, and H. A. Krebs.** 1969. Disequilibrium in the triose phosphate isomerase system in rat liver. *Biochem. J.* **115**:837-842.
28. **Villet, R. H., and K. Dalziel.** 1969. The nature of the carbon dioxide substrate and equilibrium constant of the 6-phosphogluconate dehydrogenase reaction. *Biochem. J.* **115**:633-638.
29. **Wiebe, M. G., E. Rintala, A. Tamminen, H. Simolin, L. Salusjärvi, M. Toivari, J. T. Kokkonen, J. Kiuru, R. A. Ketola, P. Jouhten, A. Huuskonen, H. Maaheimo, L. Ruohonen, and M. Penttilä.** 2008. Central carbon metabolism of *Saccharomyces cerevisiae* in anaerobic, oxygen-limited and fully aerobic steady-state conditions and following a shift to anaerobic conditions. *FEMS Yeast Res.* **8**:140-154.
30. **Wikner, C., L. Meshalkina, U. Nilsson, S. Bäckstrom, Y. Lindqvist, and G. Schneider.** 1995. His103 in yeast transketolase is required for substrate recognition and catalysis. *Eur. J. Biochem.* **233**:750-755.
31. **Wold, F., and C. E. Ballou.** 1957. Studies on the enzyme enolase. I. Equilibrium studies. *J. Biol. Chem.* **227**:301-312.

32. **Yun, S. L., A. E. Aust, and C. H. Suelter.** 1976. A revised preparation of yeast (*Saccharomyces cerevisiae*) pyruvate kinase. J. Biol. Chem. **251**:124-128.
